# Supplementary material for: Crystal structures, phase transitions, and nuclear magnetic resonance of organic–inorganic hybrid [NH2(CH3)2]2ZnBr4crystals
Source: Royal Society of Chemistry journal article supplement (doi:10.1039/d2ra06697a), 2023-01-01
Supplement: d2ra06697a1.pdf [file d2ra06697a1.pdf]

Table S1. Crystal data and structure refinement for NH<sub>2</sub>CH<sub>3</sub>ZnBr<sub>4</sub>\_150K\_a.

|                                   |                                                                  |                   |
|-----------------------------------|------------------------------------------------------------------|-------------------|
| Identification code               | NH <sub>2</sub> CH <sub>3</sub> ZnBr <sub>4</sub> _150K_a        |                   |
| Empirical formula                 | C <sub>4</sub> H <sub>16</sub> Br <sub>4</sub> N <sub>2</sub> Zn |                   |
| Formula weight                    | 477.20                                                           |                   |
| Temperature                       | 150(2) K                                                         |                   |
| Wavelength                        | 0.71073 Å                                                        |                   |
| Crystal system                    | Monoclinic                                                       |                   |
| Space group                       | P2 <sub>1</sub> /n                                               |                   |
| Unit cell dimensions              | a = 8.6262(3) Å                                                  | α = 90°.          |
|                                   | b = 11.9760(4) Å                                                 | β = 90.3690(10)°. |
|                                   | c = 13.6877(5) Å                                                 | γ = 90°.          |
| Volume                            | 1414.01(9) Å <sup>3</sup>                                        |                   |
| Z                                 | 4                                                                |                   |
| Density (calculated)              | 2.242 Mg/m <sup>3</sup>                                          |                   |
| Absorption coefficient            | 13.000 mm <sup>-1</sup>                                          |                   |
| F(000)                            | 896                                                              |                   |
| Crystal size                      | 0.237 x 0.204 x 0.106 mm <sup>3</sup>                            |                   |
| Theta range for data collection   | 2.260 to 28.281°.                                                |                   |
| Index ranges                      | -11 ≤ h ≤ 11, -15 ≤ k ≤ 15, -18 ≤ l ≤ 18                         |                   |
| Reflections collected             | 26223                                                            |                   |
| Independent reflections           | 3503 [R(int) = 0.0559]                                           |                   |
| Completeness to theta = 25.242°   | 99.8 %                                                           |                   |
| Absorption correction             | Semi-empirical from equivalents                                  |                   |
| Max. and min. transmission        | 0.7457 and 0.4159                                                |                   |
| Refinement method                 | Full-matrix least-squares on F <sup>2</sup>                      |                   |
| Data / restraints / parameters    | 3503 / 0 / 104                                                   |                   |
| Goodness-of-fit on F <sup>2</sup> | 1.048                                                            |                   |
| Final R indices [I > 2σ(I)]       | R1 = 0.0214, wR2 = 0.0455                                        |                   |
| R indices (all data)              | R1 = 0.0268, wR2 = 0.0471                                        |                   |
| Extinction coefficient            | n/a                                                              |                   |
| Largest diff. peak and hole       | 0.559 and -0.392 e.Å <sup>-3</sup>                               |                   |

Table S2. Atomic coordinates ( $\times 10^4$ ) and equivalent isotropic displacement parameters ( $\text{\AA}^2 \times 10^3$ ) for NH<sub>2</sub>CH<sub>3</sub>ZnBr<sub>4</sub>\_150K\_a. U(eq) is defined as one third of the trace of the orthogonalized U<sup>ij</sup> tensor.

|       | x       | y       | z       | U(eq) |
|-------|---------|---------|---------|-------|
| Zn(1) | 3261(1) | 7035(1) | 4226(1) | 21(1) |
| Br(1) | 3142(1) | 5038(1) | 4062(1) | 26(1) |
| Br(2) | 3070(1) | 7586(1) | 5915(1) | 28(1) |
| Br(3) | 5798(1) | 7700(1) | 3701(1) | 28(1) |
| Br(4) | 1253(1) | 7886(1) | 3281(1) | 33(1) |
| N(1)  | 2874(2) | 4927(2) | 6606(2) | 29(1) |
| N(2)  | 2054(2) | 6892(2) | 1035(2) | 32(1) |
| C(1)  | 3443(3) | 5019(2) | 7623(2) | 32(1) |
| C(2)  | 1745(4) | 5695(3) | 1155(2) | 49(1) |
| C(3)  | 1171(3) | 4792(3) | 6534(2) | 46(1) |
| C(4)  | 3725(3) | 7173(3) | 932(3)  | 46(1) |

Table S3. Bond lengths [ $\text{\AA}$ ] and angles [ $^\circ$ ] for NH<sub>2</sub>CH<sub>3</sub>ZnBr<sub>4</sub>\_150K\_a.

---

|                    |             |
|--------------------|-------------|
| Zn(1)-Br(4)        | 2.3837(4)   |
| Zn(1)-Br(1)        | 2.4052(4)   |
| Zn(1)-Br(2)        | 2.4117(4)   |
| Zn(1)-Br(3)        | 2.4406(4)   |
| N(1)-C(1)          | 1.477(3)    |
| N(1)-C(3)          | 1.480(3)    |
| N(1)-H(1NA)        | 0.9100      |
| N(1)-H(1NB)        | 0.9100      |
| N(2)-C(2)          | 1.468(4)    |
| N(2)-C(4)          | 1.487(4)    |
| N(2)-H(2NA)        | 0.9100      |
| N(2)-H(2NB)        | 0.9100      |
| C(1)-H(1A)         | 0.9800      |
| C(1)-H(1B)         | 0.9800      |
| C(1)-H(1C)         | 0.9800      |
| C(2)-H(2A)         | 0.9800      |
| C(2)-H(2B)         | 0.9800      |
| C(2)-H(2C)         | 0.9800      |
| C(3)-H(3A)         | 0.9800      |
| C(3)-H(3B)         | 0.9800      |
| C(3)-H(3C)         | 0.9800      |
| C(4)-H(4A)         | 0.9800      |
| C(4)-H(4B)         | 0.9800      |
| C(4)-H(4C)         | 0.9800      |
| Br(4)-Zn(1)-Br(1)  | 110.124(14) |
| Br(4)-Zn(1)-Br(2)  | 110.471(14) |
| Br(1)-Zn(1)-Br(2)  | 110.971(13) |
| Br(4)-Zn(1)-Br(3)  | 110.531(14) |
| Br(1)-Zn(1)-Br(3)  | 109.570(13) |
| Br(2)-Zn(1)-Br(3)  | 105.072(13) |
| C(1)-N(1)-C(3)     | 113.3(2)    |
| C(1)-N(1)-H(1NA)   | 108.9       |
| C(3)-N(1)-H(1NA)   | 108.9       |
| C(1)-N(1)-H(1NB)   | 108.9       |
| C(3)-N(1)-H(1NB)   | 108.9       |
| H(1NA)-N(1)-H(1NB) | 107.7       |
| C(2)-N(2)-C(4)     | 114.1(2)    |
| C(2)-N(2)-H(2NA)   | 108.7       |
| C(4)-N(2)-H(2NA)   | 108.7       |
| C(2)-N(2)-H(2NB)   | 108.7       |
| C(4)-N(2)-H(2NB)   | 108.7       |
| H(2NA)-N(2)-H(2NB) | 107.6       |
| N(1)-C(1)-H(1A)    | 109.5       |
| N(1)-C(1)-H(1B)    | 109.5       |
| H(1A)-C(1)-H(1B)   | 109.5       |
| N(1)-C(1)-H(1C)    | 109.5       |
| H(1A)-C(1)-H(1C)   | 109.5       |
| H(1B)-C(1)-H(1C)   | 109.5       |

|                  |       |
|------------------|-------|
| N(2)-C(2)-H(2A)  | 109.5 |
| N(2)-C(2)-H(2B)  | 109.5 |
| H(2A)-C(2)-H(2B) | 109.5 |
| N(2)-C(2)-H(2C)  | 109.5 |
| H(2A)-C(2)-H(2C) | 109.5 |
| H(2B)-C(2)-H(2C) | 109.5 |
| N(1)-C(3)-H(3A)  | 109.5 |
| N(1)-C(3)-H(3B)  | 109.5 |
| H(3A)-C(3)-H(3B) | 109.5 |
| N(1)-C(3)-H(3C)  | 109.5 |
| H(3A)-C(3)-H(3C) | 109.5 |
| H(3B)-C(3)-H(3C) | 109.5 |
| N(2)-C(4)-H(4A)  | 109.5 |
| N(2)-C(4)-H(4B)  | 109.5 |
| H(4A)-C(4)-H(4B) | 109.5 |
| N(2)-C(4)-H(4C)  | 109.5 |
| H(4A)-C(4)-H(4C) | 109.5 |
| H(4B)-C(4)-H(4C) | 109.5 |

---

Symmetry transformations used to generate equivalent atoms:

Table S4. Anisotropic displacement parameters ( $\text{\AA}^2 \times 10^3$ ) for NH<sub>2</sub>CH<sub>3</sub>ZnBr<sub>4</sub>\_150K\_a. The anisotropic displacement factor exponent takes the form:  $-2\pi^2 [ h^2 a^{*2} U^{11} + \dots + 2 h k a^* b^* U^{12} ]$

|       | U <sup>11</sup> | U <sup>22</sup> | U <sup>33</sup> | U <sup>23</sup> | U <sup>13</sup> | U <sup>12</sup> |
|-------|-----------------|-----------------|-----------------|-----------------|-----------------|-----------------|
| Zn(1) | 22(1)           | 21(1)           | 21(1)           | 0(1)            | -1(1)           | -1(1)           |
| Br(1) | 26(1)           | 21(1)           | 29(1)           | -3(1)           | 0(1)            | -1(1)           |
| Br(2) | 31(1)           | 30(1)           | 24(1)           | -7(1)           | 3(1)            | 1(1)            |
| Br(3) | 27(1)           | 30(1)           | 28(1)           | 1(1)            | 5(1)            | -7(1)           |
| Br(4) | 34(1)           | 31(1)           | 35(1)           | 5(1)            | -11(1)          | 6(1)            |
| N(1)  | 24(1)           | 35(1)           | 28(1)           | 2(1)            | 5(1)            | 0(1)            |
| N(2)  | 28(1)           | 36(1)           | 32(1)           | 2(1)            | -6(1)           | 9(1)            |
| C(1)  | 32(1)           | 36(2)           | 29(1)           | -2(1)           | 3(1)            | 1(1)            |
| C(2)  | 52(2)           | 39(2)           | 55(2)           | 8(2)            | -4(2)           | 2(1)            |
| C(3)  | 22(1)           | 67(2)           | 50(2)           | 1(2)            | -1(1)           | -9(1)           |
| C(4)  | 33(2)           | 47(2)           | 60(2)           | 2(2)            | -3(2)           | 8(1)            |

Table S5. Hydrogen coordinates ( $\times 10^4$ ) and isotropic displacement parameters ( $\text{\AA}^2 \times 10^{-3}$ ) for NH<sub>2</sub>CH<sub>3</sub>ZnBr<sub>4</sub>\_150K\_a.

|        | x    | y    | z    | U(eq) |
|--------|------|------|------|-------|
| H(1NA) | 3338 | 4332 | 6317 | 35    |
| H(1NB) | 3155 | 5552 | 6272 | 35    |
| H(2NA) | 1672 | 7264 | 1561 | 39    |
| H(2NB) | 1536 | 7140 | 496  | 39    |
| H(1A)  | 4570 | 5121 | 7623 | 48    |
| H(1B)  | 3184 | 4336 | 7981 | 48    |
| H(1C)  | 2952 | 5661 | 7940 | 48    |
| H(2A)  | 626  | 5575 | 1220 | 73    |
| H(2B)  | 2277 | 5422 | 1744 | 73    |
| H(2C)  | 2125 | 5289 | 584  | 73    |
| H(3A)  | 858  | 4781 | 5844 | 69    |
| H(3B)  | 661  | 5416 | 6865 | 69    |
| H(3C)  | 867  | 4088 | 6844 | 69    |
| H(4A)  | 4147 | 6785 | 362  | 70    |
| H(4B)  | 4289 | 6938 | 1521 | 70    |
| H(4C)  | 3839 | 7981 | 845  | 70    |

Table S6. Crystal data and structure refinement for 2\_300K\_a.

|                                   |                                             |                       |
|-----------------------------------|---------------------------------------------|-----------------------|
| Identification code               | 2_300K_a                                    |                       |
| Empirical formula                 | C4 H16 Br4 N2 Zn                            |                       |
| Formula weight                    | 477.20                                      |                       |
| Temperature                       | 300(2) K                                    |                       |
| Wavelength                        | 0.71073 Å                                   |                       |
| Crystal system                    | Monoclinic                                  |                       |
| Space group                       | P2 <sub>1</sub> /n                          |                       |
| Unit cell dimensions              | a = 8.7517(13) Å                            | $\alpha = 90^\circ$ . |
|                                   | b = 12.0041(15) Å                           | $\beta = 90^\circ$ .  |
|                                   | c = 13.911(2) Å                             | $\gamma = 90^\circ$ . |
| Volume                            | 1461.5(4) Å <sup>3</sup>                    |                       |
| Z                                 | 4                                           |                       |
| Density (calculated)              | 2.169 Mg/m <sup>3</sup>                     |                       |
| Absorption coefficient            | 12.578 mm <sup>-1</sup>                     |                       |
| F(000)                            | 896                                         |                       |
| Crystal size                      | 0.187 x 0.166 x 0.065 mm <sup>3</sup>       |                       |
| Theta range for data collection   | 2.241 to 28.473°.                           |                       |
| Index ranges                      | -11<=h<=11, -15<=k<=16, -18<=l<=18          |                       |
| Reflections collected             | 31817                                       |                       |
| Independent reflections           | 3663 [R(int) = 0.0598]                      |                       |
| Completeness to theta = 25.242°   | 99.9 %                                      |                       |
| Absorption correction             | Semi-empirical from equivalents             |                       |
| Max. and min. transmission        | 0.7457 and 0.3235                           |                       |
| Refinement method                 | Full-matrix least-squares on F <sup>2</sup> |                       |
| Data / restraints / parameters    | 3663 / 0 / 105                              |                       |
| Goodness-of-fit on F <sup>2</sup> | 0.965                                       |                       |
| Final R indices [I>2sigma(I)]     | R1 = 0.0326, wR2 = 0.0832                   |                       |
| R indices (all data)              | R1 = 0.0476, wR2 = 0.0916                   |                       |
| Extinction coefficient            | 0.0134(5)                                   |                       |
| Largest diff. peak and hole       | 0.823 and -0.929 e.Å <sup>-3</sup>          |                       |

Table S7. Atomic coordinates ( $\times 10^4$ ) and equivalent isotropic displacement parameters ( $\text{\AA}^2 \times 10^3$ ) for 2\_300K\_a.  $U(\text{eq})$  is defined as one third of the trace of the orthogonalized  $U^{ij}$  tensor.

|       | x       | y       | z       | U(eq)  |
|-------|---------|---------|---------|--------|
| Br(1) | 6964(1) | 2384(1) | 5878(1) | 60(1)  |
| Br(2) | 8740(1) | 2127(1) | 3268(1) | 72(1)  |
| Br(3) | 6839(1) | 4948(1) | 4062(1) | 57(1)  |
| Br(4) | 4236(1) | 2287(1) | 3708(1) | 60(1)  |
| Zn(1) | 6744(1) | 2951(1) | 4216(1) | 45(1)  |
| N(1)  | 2864(4) | 4940(3) | 3400(3) | 60(1)  |
| N(2)  | 2961(4) | 1856(3) | 6031(3) | 70(1)  |
| C(1)  | 1193(6) | 4771(6) | 3492(5) | 100(2) |
| C(2)  | 3415(6) | 5032(4) | 2407(3) | 69(1)  |
| C(3)  | 3277(7) | 669(5)  | 6137(5) | 104(2) |
| C(4)  | 1334(7) | 2154(5) | 5928(5) | 95(2)  |



Table S8. Bond lengths [ $\text{\AA}$ ] and angles [ $^\circ$ ] for 2\_300K\_a.

---

|                    |           |
|--------------------|-----------|
| Br(1)-Zn(1)        | 2.4186(7) |
| Br(2)-Zn(1)        | 2.4018(7) |
| Br(3)-Zn(1)        | 2.4075(6) |
| Br(4)-Zn(1)        | 2.4401(6) |
| N(1)-C(2)          | 1.467(6)  |
| N(1)-C(1)          | 1.482(6)  |
| N(1)-H(1NA)        | 0.8900    |
| N(1)-H(1NB)        | 0.8900    |
| N(2)-C(3)          | 1.459(7)  |
| N(2)-C(4)          | 1.475(7)  |
| N(2)-H(2NA)        | 0.8900    |
| N(2)-H(2NB)        | 0.8900    |
| C(1)-H(1A)         | 0.9600    |
| C(1)-H(1B)         | 0.9600    |
| C(1)-H(1C)         | 0.9600    |
| C(2)-H(2A)         | 0.9600    |
| C(2)-H(2B)         | 0.9600    |
| C(2)-H(2C)         | 0.9600    |
| C(3)-H(3A)         | 0.9600    |
| C(3)-H(3B)         | 0.9600    |
| C(3)-H(3C)         | 0.9600    |
| C(4)-H(4A)         | 0.9600    |
| C(4)-H(4B)         | 0.9600    |
| C(4)-H(4C)         | 0.9600    |
| Br(2)-Zn(1)-Br(3)  | 109.64(2) |
| Br(2)-Zn(1)-Br(1)  | 110.59(3) |
| Br(3)-Zn(1)-Br(1)  | 111.26(2) |
| Br(2)-Zn(1)-Br(4)  | 111.11(3) |
| Br(3)-Zn(1)-Br(4)  | 109.31(2) |
| Br(1)-Zn(1)-Br(4)  | 104.84(2) |
| C(2)-N(1)-C(1)     | 114.6(4)  |
| C(2)-N(1)-H(1NA)   | 108.6     |
| C(1)-N(1)-H(1NA)   | 108.6     |
| C(2)-N(1)-H(1NB)   | 108.6     |
| C(1)-N(1)-H(1NB)   | 108.6     |
| H(1NA)-N(1)-H(1NB) | 107.6     |
| C(3)-N(2)-C(4)     | 115.4(4)  |
| C(3)-N(2)-H(2NA)   | 108.4     |
| C(4)-N(2)-H(2NA)   | 108.4     |
| C(3)-N(2)-H(2NB)   | 108.4     |
| C(4)-N(2)-H(2NB)   | 108.4     |
| H(2NA)-N(2)-H(2NB) | 107.5     |
| N(1)-C(1)-H(1A)    | 109.5     |
| N(1)-C(1)-H(1B)    | 109.5     |
| H(1A)-C(1)-H(1B)   | 109.5     |
| N(1)-C(1)-H(1C)    | 109.5     |
| H(1A)-C(1)-H(1C)   | 109.5     |
| H(1B)-C(1)-H(1C)   | 109.5     |

|                  |       |
|------------------|-------|
| N(1)-C(2)-H(2A)  | 109.5 |
| N(1)-C(2)-H(2B)  | 109.5 |
| H(2A)-C(2)-H(2B) | 109.5 |
| N(1)-C(2)-H(2C)  | 109.5 |
| H(2A)-C(2)-H(2C) | 109.5 |
| H(2B)-C(2)-H(2C) | 109.5 |
| N(2)-C(3)-H(3A)  | 109.5 |
| N(2)-C(3)-H(3B)  | 109.5 |
| H(3A)-C(3)-H(3B) | 109.5 |
| N(2)-C(3)-H(3C)  | 109.5 |
| H(3A)-C(3)-H(3C) | 109.5 |
| H(3B)-C(3)-H(3C) | 109.5 |
| N(2)-C(4)-H(4A)  | 109.5 |
| N(2)-C(4)-H(4B)  | 109.5 |
| H(4A)-C(4)-H(4B) | 109.5 |
| N(2)-C(4)-H(4C)  | 109.5 |
| H(4A)-C(4)-H(4C) | 109.5 |
| H(4B)-C(4)-H(4C) | 109.5 |

---

Symmetry transformations used to generate equivalent atoms:

Table S9. Anisotropic displacement parameters ( $\text{\AA}^2 \times 10^3$ ) for 2\_300K\_a. The anisotropic displacement factor exponent takes the form:  $-2\pi^2 [ h^2 a^{*2} U^{11} + \dots + 2 h k a^* b^* U^{12} ]$

|       | U <sup>11</sup> | U <sup>22</sup> | U <sup>33</sup> | U <sup>23</sup> | U <sup>13</sup> | U <sup>12</sup> |
|-------|-----------------|-----------------|-----------------|-----------------|-----------------|-----------------|
| Br(1) | 70(1)           | 62(1)           | 48(1)           | 12(1)           | -10(1)          | 1(1)            |
| Br(2) | 73(1)           | 68(1)           | 76(1)           | -11(1)          | 24(1)           | 11(1)           |
| Br(3) | 61(1)           | 45(1)           | 64(1)           | 7(1)            | -3(1)           | -3(1)           |
| Br(4) | 57(1)           | 61(1)           | 62(1)           | -1(1)           | -14(1)          | -13(1)          |
| Zn(1) | 47(1)           | 45(1)           | 42(1)           | -1(1)           | 0(1)            | -1(1)           |
| N(1)  | 55(2)           | 68(2)           | 58(2)           | -7(2)           | -11(2)          | 1(2)            |
| N(2)  | 63(2)           | 76(3)           | 71(3)           | 7(2)            | 13(2)           | -16(2)          |
| C(1)  | 59(3)           | 141(6)          | 100(5)          | -4(4)           | 3(3)            | -17(3)          |
| C(2)  | 72(3)           | 75(3)           | 61(3)           | 5(2)            | -10(2)          | -1(2)           |
| C(3)  | 117(5)          | 73(4)           | 120(5)          | 21(4)           | 4(4)            | -6(3)           |
| C(4)  | 62(3)           | 103(4)          | 121(5)          | 2(4)            | 7(3)            | -6(3)           |

Table S10. Hydrogen coordinates ( $\times 10^4$ ) and isotropic displacement parameters ( $\text{\AA}^2 \times 10^{-3}$ ) for 2\_300K\_a.

|        | x    | y    | z    | U(eq) |
|--------|------|------|------|-------|
| H(1NA) | 3120 | 5557 | 3715 | 72    |
| H(1NB) | 3340 | 4372 | 3682 | 72    |
| H(2NA) | 3462 | 2106 | 5518 | 84    |
| H(2NB) | 3333 | 2210 | 6543 | 84    |
| H(1A)  | 665  | 5388 | 3205 | 150   |
| H(1B)  | 925  | 4720 | 4159 | 150   |
| H(1C)  | 906  | 4095 | 3170 | 150   |
| H(2A)  | 3226 | 4345 | 2074 | 104   |
| H(2B)  | 4492 | 5183 | 2409 | 104   |
| H(2C)  | 2887 | 5628 | 2088 | 104   |
| H(3A)  | 2699 | 378  | 6666 | 155   |
| H(3B)  | 4347 | 562  | 6256 | 155   |
| H(3C)  | 2993 | 287  | 5557 | 155   |
| H(4A)  | 1247 | 2931 | 5777 | 143   |
| H(4B)  | 808  | 2003 | 6519 | 143   |
| H(4C)  | 888  | 1721 | 5420 | 143   |
